# Supplementary material
Source: publisher figshare collection journal article supplement (https://acs.figshare.com/ndownloader/files/4252528)
Supplement: Supplementary file 1 [file 4252528]

## SUPPORTING INFORMATION

### Lipid Binding to the Carotenoid Binding Site in Photosynthetic Reaction Centers

Sasmit. S. Deshmukh, Kai Tang, and László Kálmán

*Department of Physics, Concordia University, Montreal, Quebec, H4B 1R6, Canada*

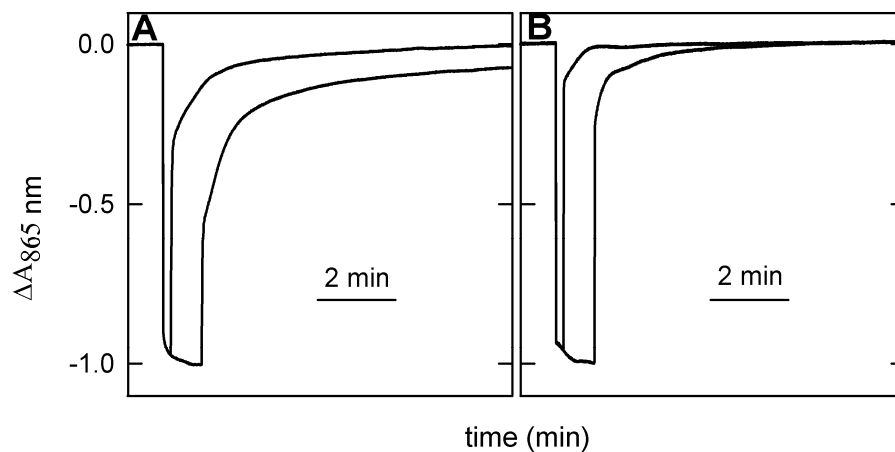

**Figure S1.** Kinetics of the light-induced absorption changes in RCs from semiaerobically grown WT (panel A) and R-26 (panel B) measured at the center of the  $Q_y$  absorption band of P. The kinetic traces were recorded at two different illumination times for both RCs: 0.2 and 1 min. Note the much larger amplitude of the longer lived components in WT. Conditions: 1  $\mu\text{M}$  RCs, 15 mM Bis-tris-propane pH 7.0, 1 mM EDTA, 0.05 % TX-100.

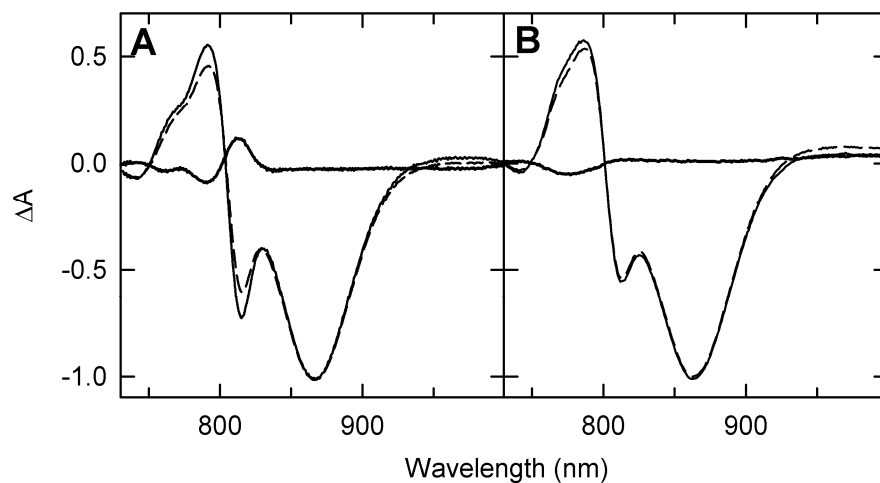

**Figure S2.** Normalized light-minus-dark difference spectra (solid lines) recorded immediately after the onset of the light and 1 minute after the illumination was turned off (dashed lines) for RCs isolated from semiaerobically grown cells from WT (A) and R-26 (B). The thick solid lines show the double difference spectra (dashed-minus-solid) and feature changes around 800 nm consistent with the decrease of the electrochromic absorption changes involving the monomers during the illumination. Note the larger decrease in WT than in R-26. Conditions as in Figure S1.

**Table S1.** Fitting parameters of the kinetic traces recorded in TX-100 and presented in Figure 2.

| sample    | $k_{(22\text{ }^{\circ}\text{C})}^a$<br>( $\text{s}^{-1}$ )<br>$\times 10^3$ | $A_{(22\text{ }^{\circ}\text{C})}^b$ | $k_{(8\text{ }^{\circ}\text{C})}^c$<br>( $\text{s}^{-1}$ )<br>$\times 10^3$ | $A_{(8\text{ }^{\circ}\text{C})}^d$ |
|-----------|------------------------------------------------------------------------------|--------------------------------------|-----------------------------------------------------------------------------|-------------------------------------|
| WT        | 48                                                                           | 0.33                                 | 75                                                                          | 0.45                                |
|           | 4                                                                            | 0.23                                 | 1.1                                                                         | 0.55                                |
| R-26      | 12                                                                           | 0.34                                 | 9.6                                                                         | 0.6                                 |
| R-26+DOPC | 15                                                                           | 0.66                                 | 8.6                                                                         | 0.62                                |
| R-26+DMPC | 8                                                                            | 0.35                                 | 3.1                                                                         | 0.53                                |
| R-26+DLPC | 13                                                                           | 0.43                                 | 0.7                                                                         | 0.6                                 |
| WT+DLPC   | 36                                                                           | 0.45                                 | 62                                                                          | 0.57                                |
|           | 2.6                                                                          | 0.15                                 | 1.1                                                                         | 0.43                                |

<sup>a, c</sup> Rate constants of the slower kinetic components observed in the recovery kinetics at 22 and 8 °C, respectively;

<sup>b, d</sup> Relative amplitudes of the slower kinetic components at 22 and 8 °C, respectively;

**Table S2.** Fitting parameters of the kinetic traces recorded in proteoliposomes and presented in Figure 5.

| sample     | $k_{(22\text{ }^{\circ}\text{C})}^a$<br>( $\text{s}^{-1}$ )<br>$\times 10^3$ | $A_{(22\text{ }^{\circ}\text{C})}^b$ | $k_{(8\text{ }^{\circ}\text{C})}^c$<br>( $\text{s}^{-1}$ )<br>$\times 10^3$ | $A_{(8\text{ }^{\circ}\text{C})}^d$ |
|------------|------------------------------------------------------------------------------|--------------------------------------|-----------------------------------------------------------------------------|-------------------------------------|
| R-26-DLPC  | 41                                                                           | 0.5                                  | 0.13                                                                        | 0.93                                |
|            | 1                                                                            | 0.5                                  | 28                                                                          | 0.07                                |
| R-26-DOPC  | 7.8                                                                          | 0.5                                  | 2.5                                                                         | 0.62                                |
|            | 0.41                                                                         | 0.5                                  | 0.4                                                                         | 0.38                                |
| R-26-DLPC* | ND                                                                           | ND                                   | 26                                                                          | 0.64                                |
|            |                                                                              |                                      | 1.3                                                                         | 0.36                                |
| WT-DLPC    | 12                                                                           | 0.2                                  | 4.1                                                                         | 0.42                                |
|            | 0.47                                                                         | 0.8                                  | 0.15                                                                        | 0.58                                |

<sup>a, c</sup> Rate constants of the observed kinetic components at 22 and 8 °C, respectively;

<sup>b, d</sup> Relative amplitudes of the observed kinetic components at 22 and 8 °C, respectively;

\* Rapid cooling (4 °C/min);

ND, not determined.
